# Supplementary material
Source: MDPI journal article supplement (https://www.mdpi.com/2071-1050/15/7/6175)
Supplement: s1 [file s1]

## Supplementary Materials

**Table S1.** Summary of default physical options in Noah-MP model

| Noah-MP namelists                                     | Options | Option Description                                           |
|-------------------------------------------------------|---------|--------------------------------------------------------------|
| Dynamic vegetation Option                             | 4       | Use table LAI and maximum vegetation fraction                |
| Canopy stomatal resistance option                     | 1       | Ball-Berry                                                   |
| BTR option                                            | 1       | Noah                                                         |
| Runoff option                                         | 3       | Original surface and subsurface runoff                       |
| Surface drag option                                   | 1       | M-O                                                          |
| Frozen soil option                                    | 1       | Linear effects, more permeable                               |
| Supercooled water option                              | 1       | No iteration                                                 |
| Radiative transfer option                             | 3       | Two-stream applied to vegetated fraction                     |
| Snow albedo option                                    | 2       | CLASS                                                        |
| Partitioning precipitation into rainfall and snowfall | 1       | Jordan                                                       |
| TBOT option                                           | 2       | Noah                                                         |
| Temperature time scheme                               | 3       | Semi-implicit                                                |
| Glacier option                                        | 2       | Ice treatment more like original Noah                        |
| Surface resistance option                             | 4       | Sakaguchi and Zeng for non-snow; rsurf = rsurf_snow for snow |

**Table S2.** Scores of sensitivity tests of Noah-MP options, the options chosen for each test are listed in the names.

| Name                | CC   | BC(m <sup>3</sup> /s) | RMSE(m <sup>3</sup> /s) | NSE  |
|---------------------|------|-----------------------|-------------------------|------|
| run1_pcp1_gla1_res1 | 0.42 | -25.88                | 67.08                   | 0.18 |
| run1_pcp1_gla1_res2 | 0.44 | 7.21                  | 57.10                   | 0.19 |
| run1_pcp1_gla1_res3 | 0.51 | 25.77                 | 57.59                   | 0.26 |
| run1_pcp1_gla1_res4 | 0.38 | -13.92                | 63.25                   | 0.14 |
| run1_pcp1_gla2_res1 | 0.42 | -25.88                | 67.10                   | 0.18 |
| run1_pcp1_gla2_res2 | 0.44 | 7.21                  | 57.12                   | 0.19 |
| run1_pcp1_gla2_res3 | 0.51 | 25.77                 | 57.61                   | 0.26 |
| run1_pcp1_gla2_res4 | 0.38 | -13.92                | 63.27                   | 0.14 |
| run1_pcp2_gla1_res1 | 0.42 | -26.20                | 67.34                   | 0.18 |
| run1_pcp2_gla1_res2 | 0.44 | 6.93                  | 57.18                   | 0.19 |
| run1_pcp2_gla1_res3 | 0.51 | 25.46                 | 57.50                   | 0.26 |
| run1_pcp2_gla1_res4 | 0.38 | -14.15                | 63.42                   | 0.14 |
| run1_pcp2_gla2_res1 | 0.42 | -26.20                | 67.37                   | 0.18 |
| run1_pcp2_gla2_res2 | 0.44 | 6.93                  | 57.20                   | 0.19 |
| run1_pcp2_gla2_res3 | 0.51 | 25.46                 | 57.52                   | 0.26 |
| run1_pcp2_gla2_res4 | 0.38 | -14.15                | 63.45                   | 0.14 |
| run1_pcp3_gla1_res1 | 0.44 | -27.83                | 67.78                   | 0.19 |
| run1_pcp3_gla1_res2 | 0.46 | 4.91                  | 56.61                   | 0.21 |
| run1_pcp3_gla1_res3 | 0.52 | 23.55                 | 56.22                   | 0.27 |
| run1_pcp3_gla1_res4 | 0.40 | -16.55                | 63.78                   | 0.16 |
| run1_pcp3_gla2_res1 | 0.44 | -27.83                | 67.80                   | 0.19 |
| run1_pcp3_gla2_res2 | 0.46 | 4.91                  | 56.63                   | 0.21 |
| run1_pcp3_gla2_res3 | 0.52 | 23.55                 | 56.24                   | 0.27 |
| run1_pcp3_gla2_res4 | 0.40 | -16.55                | 63.80                   | 0.16 |
| run2_pcp1_gla1_res1 | 0.51 | 29.02                 | 62.63                   | 0.26 |
| run2_pcp1_gla1_res2 | 0.52 | 38.53                 | 65.18                   | 0.27 |
| run2_pcp1_gla1_res3 | 0.60 | 51.72                 | 69.77                   | 0.36 |
| run2_pcp1_gla1_res4 | 0.50 | 34.81                 | 64.60                   | 0.25 |
| run2_pcp1_gla2_res1 | 0.51 | 29.02                 | 62.66                   | 0.26 |
| run2_pcp1_gla2_res2 | 0.52 | 38.53                 | 65.20                   | 0.27 |
| run2_pcp1_gla2_res3 | 0.60 | 51.73                 | 69.79                   | 0.36 |
| run2_pcp1_gla2_res4 | 0.50 | 34.81                 | 64.62                   | 0.25 |
| run2_pcp2_gla1_res1 | 0.50 | 28.81                 | 62.67                   | 0.25 |
| run2_pcp2_gla1_res2 | 0.52 | 38.33                 | 65.18                   | 0.27 |
| run2_pcp2_gla1_res3 | 0.60 | 51.50                 | 69.67                   | 0.36 |
| run2_pcp2_gla1_res4 | 0.50 | 34.61                 | 64.62                   | 0.25 |
| run2_pcp2_gla2_res1 | 0.50 | 28.81                 | 62.70                   | 0.25 |
| run2_pcp2_gla2_res2 | 0.52 | 38.33                 | 65.20                   | 0.27 |

|                            |             |              |              |             |
|----------------------------|-------------|--------------|--------------|-------------|
| run2_pcp2_gla2_res3        | 0.60        | 51.50        | 69.70        | 0.36        |
| run2_pcp2_gla2_res4        | 0.50        | 34.62        | 64.65        | 0.25        |
| run2_pcp3_gla1_res1        | 0.52        | 26.50        | 61.69        | 0.27        |
| run2_pcp3_gla1_res2        | 0.54        | 35.91        | 63.75        | 0.29        |
| run2_pcp3_gla1_res3        | 0.61        | 49.27        | 67.67        | 0.37        |
| run2_pcp3_gla1_res4        | 0.51        | 32.16        | 63.34        | 0.26        |
| run2_pcp3_gla2_res1        | 0.52        | 26.50        | 61.72        | 0.27        |
| run2_pcp3_gla2_res2        | 0.54        | 35.91        | 63.78        | 0.29        |
| run2_pcp3_gla2_res3        | 0.61        | 49.27        | 67.69        | 0.37        |
| run2_pcp3_gla2_res4        | 0.51        | 32.16        | 63.36        | 0.26        |
| run3_pcp1_gla1_res1        | 0.73        | -6.06        | 42.53        | 0.54        |
| run3_pcp1_gla1_res2        | 0.74        | 21.96        | 45.58        | 0.54        |
| run3_pcp1_gla1_res3        | 0.78        | 40.49        | 54.49        | 0.61        |
| run3_pcp1_gla1_res4        | 0.74        | 4.58         | 40.20        | 0.55        |
| run3_pcp1_gla2_res1        | 0.73        | -6.06        | 42.54        | 0.54        |
| run3_pcp1_gla2_res2        | 0.74        | 21.96        | 45.59        | 0.54        |
| run3_pcp1_gla2_res3        | 0.78        | 40.49        | 54.50        | 0.61        |
| run3_pcp1_gla2_res4        | 0.74        | 4.58         | 40.21        | 0.55        |
| run3_pcp2_gla1_res1        | 0.74        | -6.43        | 42.46        | 0.54        |
| run3_pcp2_gla1_res2        | 0.74        | 21.62        | 45.37        | 0.54        |
| <b>run3_pcp2_gla1_res3</b> | <b>0.78</b> | <b>40.12</b> | <b>54.16</b> | <b>0.61</b> |
| run3_pcp2_gla1_res4        | 0.75        | 4.26         | 40.11        | 0.56        |
| run3_pcp2_gla2_res1        | 0.74        | -6.43        | 42.47        | 0.54        |
| run3_pcp2_gla2_res2        | 0.74        | 21.62        | 45.38        | 0.54        |
| run3_pcp2_gla2_res3        | 0.78        | 40.12        | 54.17        | 0.61        |
| run3_pcp2_gla2_res4        | 0.75        | 4.26         | 40.12        | 0.56        |
| run3_pcp3_gla1_res1        | 0.73        | -7.87        | 43.35        | 0.54        |
| run3_pcp3_gla1_res2        | 0.73        | 19.82        | 44.95        | 0.54        |
| run3_pcp3_gla1_res3        | 0.78        | 38.50        | 53.14        | 0.61        |
| run3_pcp3_gla1_res4        | 0.74        | 2.21         | 40.56        | 0.55        |
| run3_pcp3_gla2_res1        | 0.73        | -7.87        | 43.35        | 0.53        |
| run3_pcp3_gla2_res2        | 0.73        | 19.82        | 44.96        | 0.54        |
| run3_pcp3_gla2_res3        | 0.78        | 38.50        | 53.15        | 0.61        |
| run3_pcp3_gla2_res4        | 0.74        | 2.21         | 40.57        | 0.55        |
| run4_pcp1_gla1_res1        | 0.66        | -25.28       | 63.03        | 0.44        |
| run4_pcp1_gla1_res2        | 0.59        | 11.05        | 55.89        | 0.34        |
| run4_pcp1_gla1_res3        | 0.63        | 30.81        | 56.75        | 0.39        |
| run4_pcp1_gla1_res4        | 0.58        | -13.28       | 62.78        | 0.34        |
| run4_pcp1_gla2_res1        | 0.66        | -25.28       | 63.07        | 0.44        |
| run4_pcp1_gla2_res2        | 0.59        | 11.05        | 55.93        | 0.34        |
| run4_pcp1_gla2_res3        | 0.62        | 30.81        | 56.78        | 0.39        |
| run4_pcp1_gla2_res4        | 0.58        | -13.28       | 62.82        | 0.34        |
| run4_pcp2_gla1_res1        | 0.66        | -25.60       | 63.34        | 0.44        |
| run4_pcp2_gla1_res2        | 0.58        | 10.76        | 56.00        | 0.34        |

|                     |      |        |       |      |
|---------------------|------|--------|-------|------|
| run4_pcp2_gla1_res3 | 0.62 | 30.51  | 56.69 | 0.39 |
| run4_pcp2_gla1_res4 | 0.58 | -13.53 | 63.02 | 0.34 |
| run4_pcp2_gla2_res1 | 0.66 | -25.60 | 63.38 | 0.44 |
| run4_pcp2_gla2_res2 | 0.58 | 10.76  | 56.03 | 0.34 |
| run4_pcp2_gla2_res3 | 0.62 | 30.51  | 56.72 | 0.39 |
| run4_pcp2_gla2_res4 | 0.58 | -13.53 | 63.06 | 0.34 |
| run4_pcp3_gla1_res1 | 0.66 | -27.20 | 64.61 | 0.44 |
| run4_pcp3_gla1_res2 | 0.59 | 8.77   | 55.85 | 0.35 |
| run4_pcp3_gla1_res3 | 0.63 | 28.63  | 55.68 | 0.40 |
| run4_pcp3_gla1_res4 | 0.59 | -15.91 | 64.12 | 0.35 |
| run4_pcp3_gla2_res1 | 0.66 | -27.20 | 64.64 | 0.44 |
| run4_pcp3_gla2_res2 | 0.59 | 8.77   | 55.88 | 0.35 |
| run4_pcp3_gla2_res3 | 0.63 | 28.63  | 55.71 | 0.40 |
| run4_pcp3_gla2_res4 | 0.59 | -15.91 | 64.15 | 0.35 |

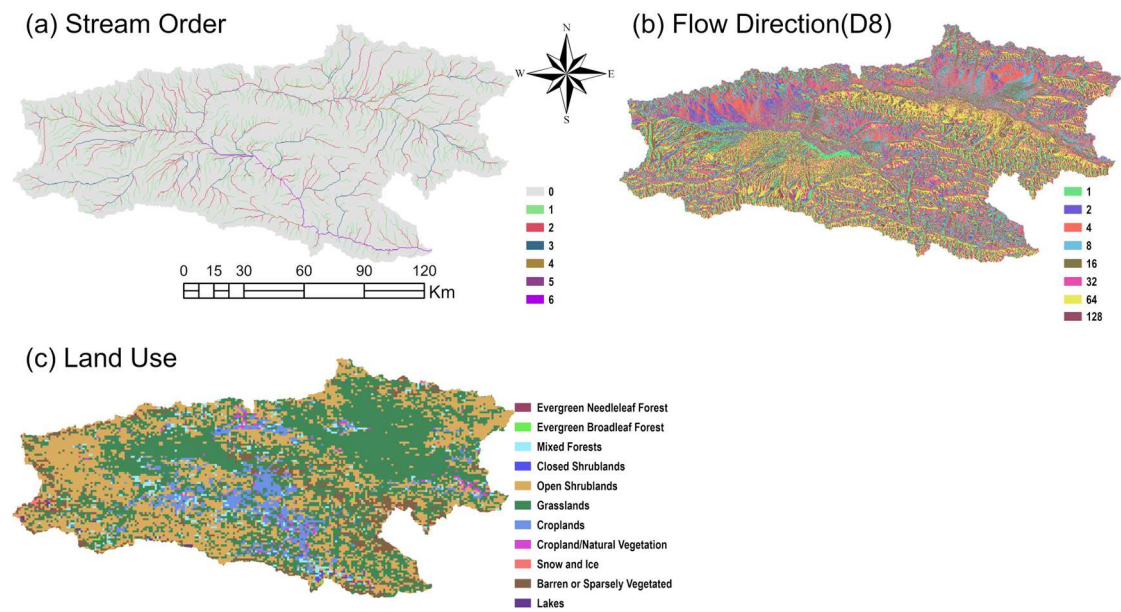

**Figure S1.** Stream order (a), flow direction (b) and land use (c) of the study area.

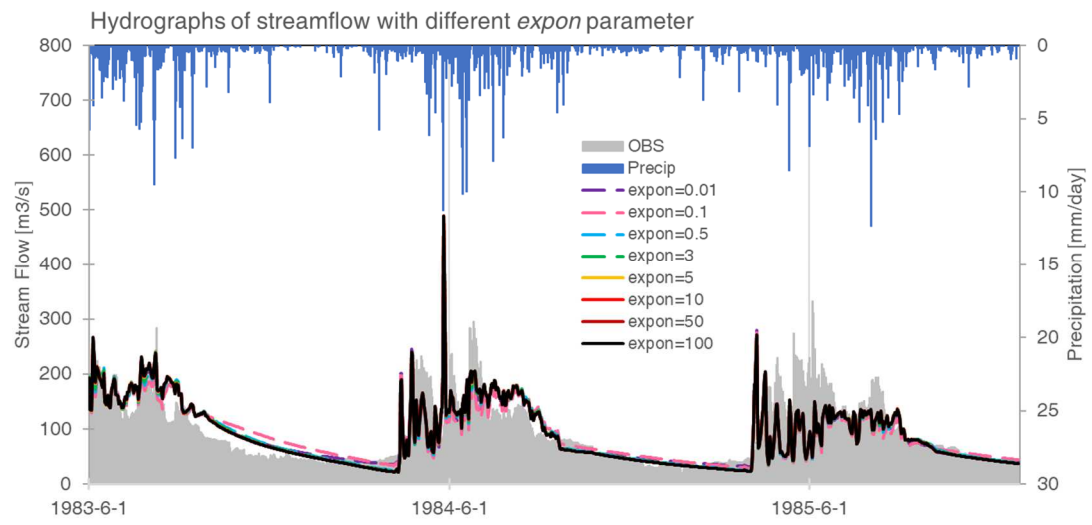

**Figure S2.** Simulated hydrographs with the sensitivity tests of *expon* ranging from 0.01 to 100. The precipitation and observed streamflow are shown in blue and gray bars, respectively.

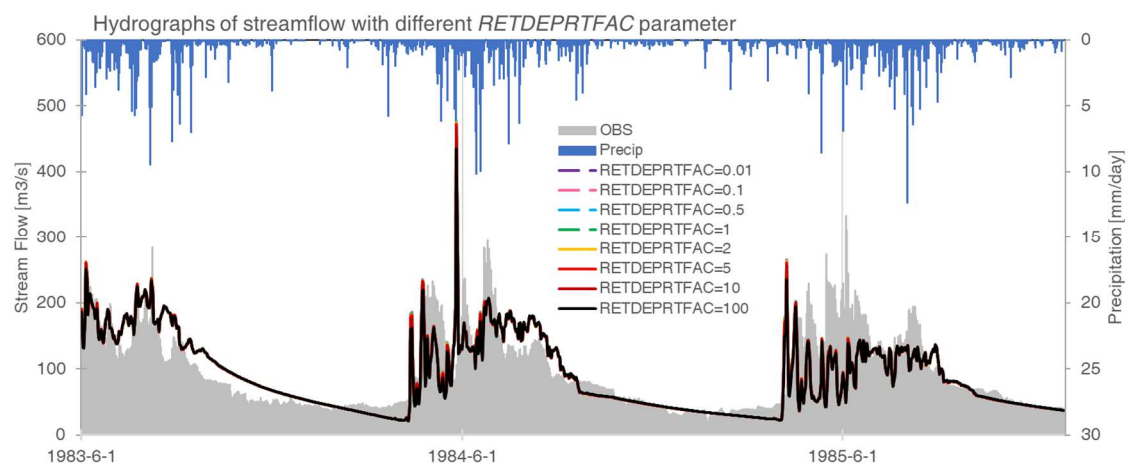

**Figure S3.** Same as Figure S2, but for the sensitivity tests of *RETDEPRTFAC* parameter ranging from 0.01 to 100.

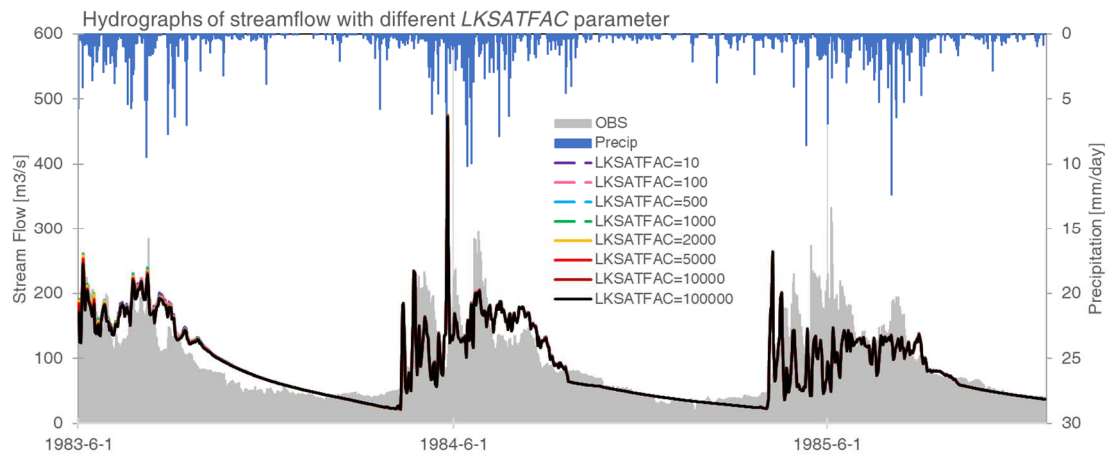

**Figure S4.** Same as Figure S2, but for the sensitivity tests of LKSATFAC parameter ranging from 10 to 100000.



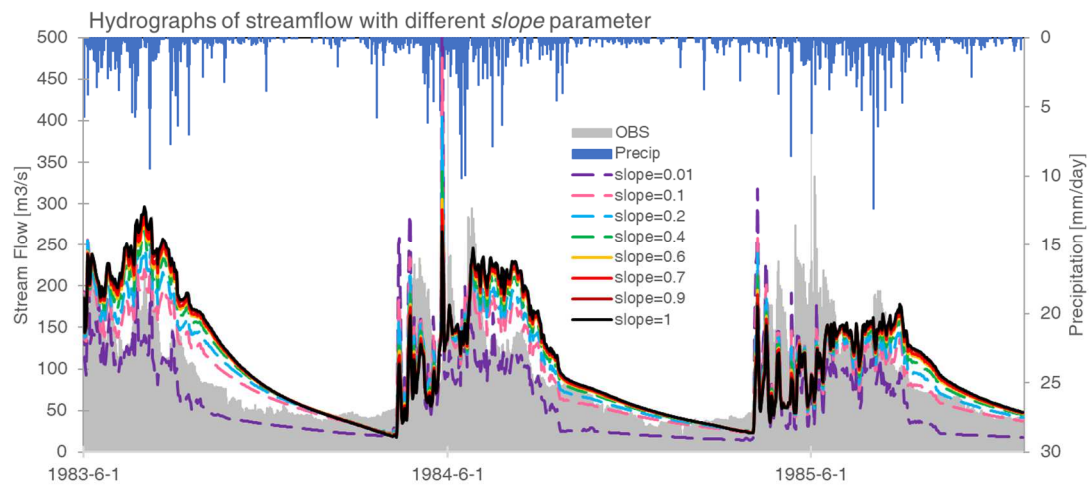

**Figure S5.** Same as Figure S2, but for the sensitivity tests of slope ranging from 0.01 to 1.

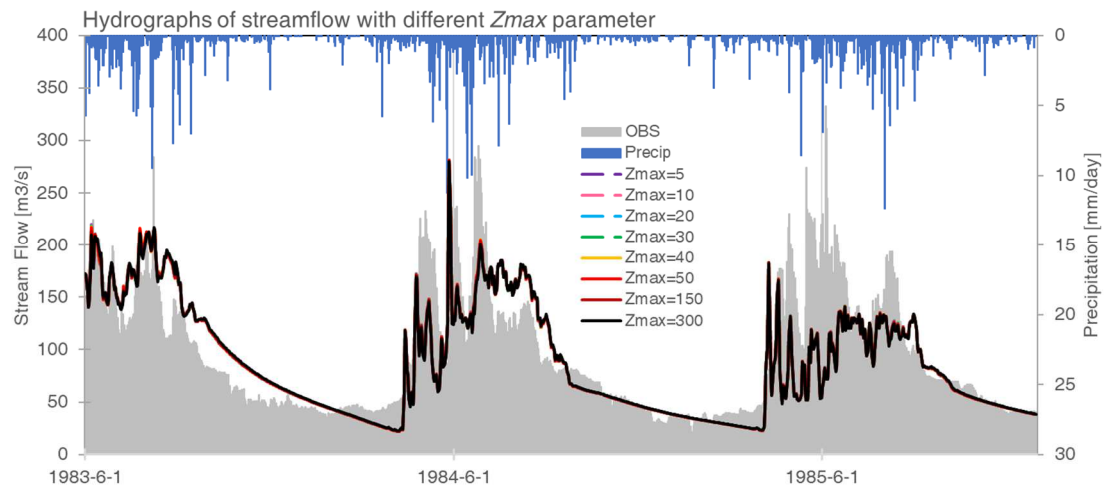

**Figure S6.** Same as Figure S2, but for the sensitivity tests of  $Z_{max}$  parameter ranging from 5 to 300, the calibration factor is multiplied.

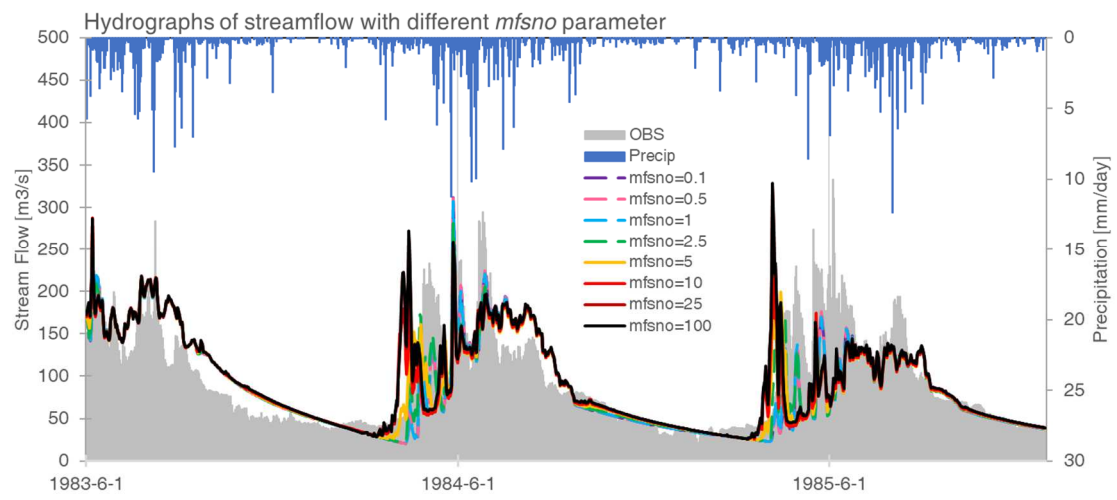

**Figure S7.** Same as Figure S2, but for the sensitivity tests of *mfsno* parameter ranging from 0.1 to 100.

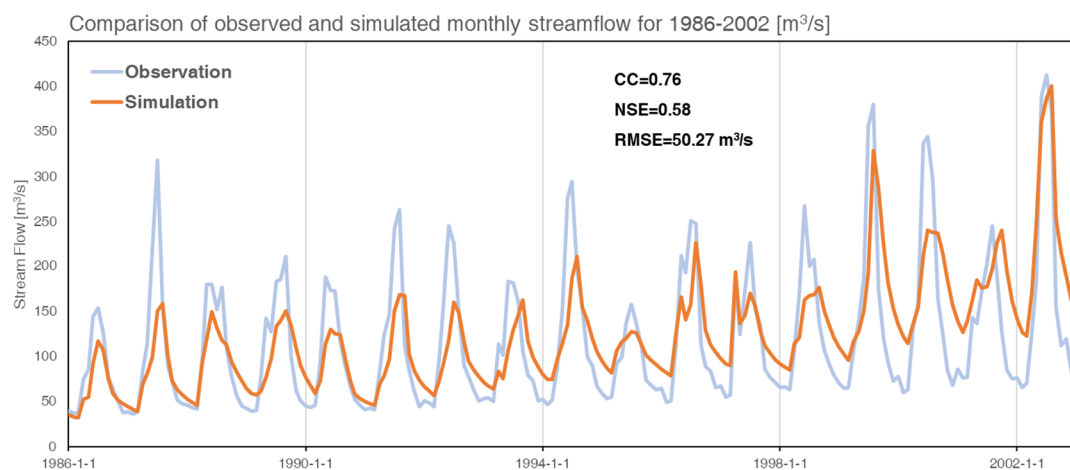

**Figure S8.** Comparison of observed and simulated monthly streamflow during the evaluation period.
